1 Original Article

2

3 **Intraspecific variation in land use-related functional traits in**

4 ***Plantago lanceolata***

5

6 Bence Gáspár<sup>1,2\*</sup>, Oliver Bossdorf<sup>1</sup>, Madalin Parepa<sup>1</sup>

7

8 <sup>1</sup> *Institute of Evolution and Ecology, University of Tübingen, Auf der Morgenstelle 5, 72070*

9 *Tübingen, Germany*

10 <sup>2</sup> *Department Community Ecology, Helmholtz-Centre for Environmental Research – UFZ,*

11 *Theodor-Lieser-Str. 4, 06120 Halle, Germany*

12

13 *\*Author for correspondence. Email: bence.gaspar@uni-tuebingen.de*

14

## 15 **Abstract**

- 16 • **Background and aims** Intraspecific variation in functional traits is essential for the  
17 evolutionary success of organisms. The co-variation between trait variation and  
18 environment, as well as between different traits, can help us to understand which  
19 ecological factors drive habitat adaptation, and to what extent adaptation may be  
20 constrained by trait correlations and trade-offs. In managed grasslands, plants experience  
21 a combination of competition, recurrent biomass removal and nutrient pulses. Each of  
22 these ecological challenges requires specific plant tolerances, and populations should  
23 locally adapt if intraspecific variation exists in these traits.
- 24 • **Methods** We studied variation in land use-related traits in the common grassland plant  
25 *Plantago lanceolata*. In a common environment, we quantified the competitive ability  
26 ( $R^*$ ), clipping tolerance and responses to a nitrogen pulse of plants from 54 populations  
27 with different land use intensities across Germany.
- 28 • **Key results** We found significant population differentiation in competitive ability but  
29 there was little evidence that trait variation was related to land use intensity. There was a  
30 positive relationship between competitive ability and clipping tolerance at the population  
31 level, indicating a genetic, and possibly functional, link between these two traits. In  
32 contrast, clipping tolerance and nitrogen responses were negatively correlated at the  
33 levels of plant individuals, indicating a physiological trade-off between plant responses to  
34 these two land-use processes.
- 35 • **Conclusions** Our results show that there is substantial intraspecific variation in some of  
36 the key functional traits for plant success in managed grasslands, and that rapid evolution  
37 and adaptation is therefore possible in these traits.

38

## 39 **Introduction**

40 Understanding evolution in response to land use in grassland plants is of great interest  
41 because of the wide distribution and economic importance of these ecosystems, and because  
42 land use change is the strongest driver of global change (Foley *et al.*, 2005, Díaz *et al.*, 2019).  
43 Already from the early 20th century, grassland researchers showed that different management  
44 regimes resulted in rapid evolutionary changes in a range of grassland species. For instance,  
45 in a common-garden collection of over 400 *Dactylis glomerata* ecotypes, Stapledon (1928)  
46 found that there were persistent growth form differences between plants from different kinds  
47 of pastures and meadows. Later, Warwick and Briggs, in their classic studies on the  
48 “genecology of lawn weeds”, found similar results for several grassland species, e.g. dwarf,  
49 prostrate morphotypes originating from frequently mown lawns, and more erect ones in  
50 neighbouring populations that lacked the frequent mowing (Warwick & Briggs 1978, 1979).  
51 Evolution in response to land use was also found in the famous long-term Park Grass  
52 Experiment where Snaydon and Davies (1976) demonstrated local adaptation of *Antoxanthum*  
53 *odoratum* to different fertilisation and liming treatments (see also Davies & Snaydon 1973,  
54 1976). In all of these classic studies, however, researchers compared simple categories of land  
55 use such as pastures versus meadows, or different types of fertilisation regimes, whereas  
56 finer-resolution analyses of land use processes are still rare. Moreover, previous studies  
57 usually focused on traits relevant for agriculture, such as yield, growth form and phenology,  
58 whereas other ecologically relevant functional traits received less attention.

59 From a plant eye's view, three of the key processes in grasslands are (1) competition  
60 with neighbouring plants, (2) the temporary nutrient pulses created by animal droppings or  
61 fertilisation, and (3) the regular disturbance and biomass removal imposed by mowing or  
62 grazing. The abilities of plants to compete with neighbours, exploit nutrient pulses, and  
63 tolerate biomass removal are thus important functional traits in grassland plants.

64 Competition ultimately reduces the survival, growth or reproduction of an individual  
65 plant (Aarsen & Keogh, 2002), and plant species differ in the degree to which they they are  
66 impacted by neighbours (e.g. Keddy, 1990; Aarssen, 1992; Tokeshi, 2009). Plant competitive  
67 ability can be quantified in different ways (Aarssen & Keogh, 2002), and at the species level  
68 it appears to be particularly the ability to persist at low nutrient levels that makes some plant  
69 species outcompete others (resource ratio hypothesis; Tilman 1985). The significance of the  
70 so-called  $R^*$  value of species – the lowest resource level that allows persistence – has been  
71 proven by many species-level experimental studies (Wilson *et al.*, 2007). At the intraspecific  
72 level, a number of previous studies demonstrated genetically-based variation in competitive  
73 ability and the selective agency of neighbouring plants (Cheplick, 2015), but intraspecific  
74 variation in  $R^*$  has so far not been examined.

75 The second key process are nutrient pulses. Many ecosystems experience fluctuating  
76 resource availability, e.g. because of snowmelt, seasonal weather events or fires (Ostfeld &  
77 Keesing, 2000). Human activity is especially associated with such pulses, either indirectly  
78 through causing extreme climatic events (Coumou & Rahmstorf, 2012), or more directly  
79 through intentional nutrient deposition in agricultural landscapes. Resource pulses can impact  
80 population dynamics across communities and trophic networks (Gratton & Denno, 2003;  
81 Yang *et al.*, 2008) as well as across generations (Miao *et al.*, 1991), and they tend to promote  
82 particular plant species over others (Bilbrough & Caldwell, 1997), or even the spread of plant  
83 invaders (Parepa *et al.*, 2013). However, to our knowledge no previous study has investigated  
84 plant responses to nutrient pulses at the intraspecific level.

85 The third key process in grasslands is recurrent biomass removal. While strong mowing  
86 or grazing generally reduce fitness, plants possess the ability to regrow and to some extent  
87 compensate for such damage. Because of this, some species are able to maintain their fitness  
88 or even overcompensate and increase it in response to moderate levels of herbivory  
89 (McNaughton, 1983; Strauss & Agrawal, 1999). Plant tolerance to biomass damage has been

90 extensively researched, and previous studies have repeatedly demonstrated not only species  
91 differences but also heritable variation within and among natural populations (e.g. Bergelson  
92 & Crawley, 1992; Agrawal, 1998; Strauss & Agrawal, 1999; Johnson, 2011), although rarely  
93 in relation to land use (but see Lennartsson *et al.*, 1997, 1998).

94 While all of the three described functional traits are expected to be important for  
95 success in managed grasslands, it seems unlikely that plants can evolutionarily improve all of  
96 them simultaneously. Increased competitive ability (= lower  $R^*$ ) requires greater resource-  
97 efficiency, while stronger responses to nutrient pulses are only possible if plants are on the  
98 faster (= less resource-efficient) side of the fast-slow plant economy spectrum (Reich, 2014).  
99 Tolerance to biomass removal is usually based on belowground storage of resources, which  
100 means that some resources are not available for other purposes anymore. In general, we  
101 should expect evolutionary trade-offs (Agrawal *et al.*, 2010) between the three functional  
102 traits, and that the specific phenotypes evolving in different grasslands depend on the local  
103 intensities of fertilisation versus mowing and grazing damage.

104 We addressed these questions in the framework of the Biodiversity Exploratories  
105 project ([www.biodiversity-exploratories.de](http://www.biodiversity-exploratories.de)), a large-scale and long-term network of  
106 ecological study sites for understanding relationships between land use, biodiversity and  
107 ecosystem functioning. The project includes 150 grassland plots across Germany (Fischer *et*  
108 *al.*, 2010), with 50 plots in each of the three regions Schorfheide-Chorin (northern Germany),  
109 Hainich-Dün (central Germany) and Schwäbische Alb (southwest Germany). Within each  
110 region, the plots cover a broad range of land use types and intensities. The detailed land use  
111 information available for these plots, with precise data on mowing frequencies, livestock  
112 densities and amounts of fertilisation, obtained from annual surveys (Blüthgen *et al.*, 2012), is  
113 a unique feature of the Biodiversity Exploratories project and, together with the large number  
114 of plots, makes it a powerful system for studying evolution in managed grasslands.

115           There is already evidence from the Biodiversity Exploratories that the phenotypes of  
116 several grassland species evolve in response to land use (Kloss *et al.*, 2011; Völler *et al.*,  
117 2013, 2017). We built on these studies and examined 54 populations of the common perennial  
118 *Plantago lanceolata*. Unlike the previous studies, which only conducted simple phenotyping  
119 in a common environment, we carried out a greenhouse experiment with a series of treatments  
120 (Fig. 1) which allowed us to quantify the  $R^*$  values of plants, as well as their nutrient pulse  
121 responses and clipping tolerances. Specifically, we asked the following questions: (1) Is there  
122 intraspecific variation in the three functional traits in *P. lanceolata*? (2) What is the  
123 relationship between land use and the variation in these traits? (3) Are there trade-offs  
124 between the three traits, and are these trade-offs influenced by land use intensity?

125

## 126 **Materials and Methods**

### 127 *Study species and experimental design*

128 To test the questions outlined above, we worked with *Plantago lanceolata* L.  
129 (Plantaginaceae), a short-lived perennial rosette herb that is very common in European  
130 grasslands and grows under a wide range of environmental conditions. *P. lanceolata* is also  
131 one of the most common plant species in the Biodiversity Exploratories, occurring on over  
132 100 of the 150 grassland plots. In September 2015, we collected ripe seeds of *P. lanceolata* in  
133 each of the three regions, and from the broadest possible land-use gradient in each  
134 (Supplementary Table S2). Altogether, we sampled seeds from 54 plots, with 5–12 individual  
135 plants per plot.

136 We stratified the seeds at 5°C under moist and dark conditions for three weeks (Pons,  
137 1992) and transplanted the germinated seedlings to 1-L pots filled with a 7:1.5:1 mixture of  
138 nutrient-poor soil, vermiculite and sand, with 5–12 individuals per population and a total of  
139 540 plants (Supplementary Table S2). The pots were placed in a climate-controlled  
140 greenhouse with temperature set to 21°C/15°C at a 16h/8h day/night cycle. After six weeks,

141 we rearranged all pots into a randomised block design, and we let the plants grow for another  
142 seven weeks to ensure strong nutrient depletion in all pots (Fig. 1). At this point, we took a 5  
143 cm<sup>3</sup> soil sample from each pot that was later analysed for total nitrogen content with a  
144 EuroEA Elemental Analyser (HEKAtech, Wegberg, Germany) at the Soil Biogeochemistry  
145 Lab at Karlsruhe Institute of Technology, and we measured the chlorophyll content of two  
146 leaves on each plant with a SPAD 502 chlorophyll meter (Konica-Minolta, Tokyo, Japan).  
147 After that, we fertilised each plant with 10 ml of liquid NPK fertiliser (Wuxal  
148 Universaldünger; Hauert MANNA Düngerwerke GmbH, Nürnberg, Germany) at a  
149 concentration equivalent to 50 kg N/ha. Ten days later, we measured chlorophyll content  
150 again on two newly grown leaves of each plant. Two weeks after adding the fertiliser, we  
151 clipped all plants one centimetre above ground. After another three weeks, we harvested the  
152 aboveground biomass of all plants, dried it at 70°C for three days, and weighed it.

153

#### 154 *Data Analysis*

155 Our data analyses generally focused on three variables: (1) the competitive ability of each  
156 plant, estimated as  $1-R^*$  (Tilman, 1985) where  $R^*$  was the fraction of total nitrogen in the  
157 potting soil left after 11 weeks of growth, (2) the pulse response as the ratio between the leaf  
158 chlorophyll contents after and before the fertilisation, with higher values indicating more  
159 successful utilisation of the added nitrogen, and (3) the clipping tolerance of plants, calculated  
160 as the ratio between their aboveground biomass from the second and first harvest, again with  
161 higher values indicating faster recovery from clipping damage.

162 Prior to the main analyses, we simplified our data by removing sources of variation that  
163 were not relevant to our study questions. We fitted linear models with the three regions of the  
164 Biodiversity Exploratories and the blocks in the greenhouse as fixed factors to each dependent  
165 variable, and we used the residuals from these models for all subsequent analyses (Manning *et*

166 *al.*, 2015; Soliveres *et al.*, 2016). To improve the normality of error distributions, the data for  
167 pulse response and clipping tolerance were additionally log-transformed.

168 First, we tested for intraspecific variation in the three focus traits with mixed-effect  
169 models that included populations as fixed factors and maternal seed families nested within  
170 populations as random factors (Zuur *et al.*, 2009; see Supplementary Information Table S1 for  
171 model formulas). Second, we tested for relationships between land use and the three traits by  
172 fitting separate mixed models for each combination of land use intensities (mowing,  
173 fertilisation, grazing) and trait (competitive ability, pulse response, clipping tolerance), with  
174 each model including one of the land use intensities as explanatory variable plus population  
175 and maternal seed families nested within populations as random factors (Table S1). Next, we  
176 tested for trade-offs between the three focus traits by examining their statistical relationships  
177 at the level of individuals, seed families and populations. At the individual-level, we fitted  
178 mixed models with random intercept and slope that included the respective other trait as  
179 explanatory variable, plus population and family nested within population as random factors.  
180 At the family level, we analysed family means and included only population as random factor,  
181 and at the population level, we used simple linear models regressing the population means of  
182 two traits against each other. In the cases where we found significant relationships between  
183 the traits, we proceeded to the final step in our analyses where we tested the effects of land  
184 use on trait relationships. We did this through a series of mixed models with random  
185 intercepts and slopes that included the respective other trait, one of the three land use  
186 intensities, and their interactions, as fixed factors, plus populations and families nested within  
187 populations as random factors. All statistical analyses were done in R (R Development Core  
188 Team, 2008). We corrected all *P*-values for false discovery rates (FDR).

189



## 190 **Results**

191 We found significant heritable variation, both at the population and seed family level, for  
192 competitive ability, but only marginally significant family-level variation in clipping  
193 tolerance, and no significant variation at all in pulse response (Table 1 and Figure 2). There  
194 were no significant relationships between land use intensity and the three studied functional  
195 traits (Table 2). When we tested for relationships between competitive ability, pulse response  
196 and clipping tolerance, we found significant negative relationships between pulse response  
197 and clipping tolerance at the level of individuals and seed families, and a significant positive  
198 relationship between competitive ability and clipping tolerance at the population level (Table  
199 3 and Fig 3). Furthermore, we found a significant effect of mowing on the individual-level  
200 relationship between pulse response and clipping tolerance ( $F = 9.08$ ,  $P = 0.025$  for mowing x  
201 pulse response interaction), with the negative relationship between the two traits disappearing  
202 at higher mowing intensities (Fig 4). There were no other significant land use effects on trait  
203 relationships.

204

## 205 **Discussion**

206 To understand plant intraspecific variation in relation to land use, we studied 54 grassland  
207 populations of *Plantago lanceolata* that strongly differed in their intensities of mowing,  
208 grazing and fertilisation. We specifically examined three functional traits that we expected to  
209 be important for plant survival in grasslands: competitive ability, clipping tolerance and the  
210 ability of plants to quickly respond to nutrient pulses. We found substantial intraspecific  
211 variation in competitive ability ( $R^*$ ) but not in the other two traits, and there was no evidence  
212 for population-level relationships between traits and land-use intensity. However, there were  
213 several positive or negative relationships between functional traits at the levels of individuals,  
214 families or populations, indicating physiological or evolutionary links between these traits.  
215 Below, we discuss the results in detail, and attempt to place them into a broader context.

216

217 *Intraspecific variation*

218 A necessary prerequisite for genetic differentiation and local adaptation in the examined traits  
219 is that our study system harbours significant intraspecific variation. We did not find any  
220 significant family- or population-level variation in clipping tolerance and plant responses to a  
221 nutrient pulse, but there was substantial intraspecific variation in  $R^*$  competitive ability, both  
222 at the level of seed families and populations. To our knowledge, this is the first time that  
223 intraspecific variation, and thus microevolution, in this aspect of competitive ability has been  
224 studied and demonstrated in plants.

225 We were surprised to not find population differentiation in clipping tolerance because  
226 intraspecific variation has been repeatedly shown in other plant species (e.g. Agrawal *et al.*,  
227 1999; Johnson, 2011; Juenger & Bergelson, 2000; Strauss & Agrawal, 1999; Deng *et al.*  
228 unpublished). We also found no population differentiation in pulse response, and there are no  
229 previous studies on intraspecific variation in this trait. With 54 populations and 199 seed  
230 families, a lack of statistical power is an unlikely explanation in our case. Instead, we think  
231 that it may have been a combination of weak true patterns and high signal-to-noise ratio. First,  
232 since *Plantago lanceolata* is wind-pollinated and self-incompatible (Kuiper & Bos, 1992),  
233 there is generally strong gene flow and relatively weak population differentiation in this  
234 species (Gáspár *et al.* 2019). Second, we worked with an  $F_1$  generation that had random  
235 fathers (from the field) but that, unlike under field conditions, was not experiencing strong  
236 natural selection. This likely further increased variation among individuals and therefore  
237 lowered the signal-to-noise ratio in our system. Finally, clipping tolerance and pulse response  
238 are both derived traits based on several, error-prone measurements, and thus error propagation  
239 could have further added to this problem. However, in spite of all this, we did find significant  
240 family- and population-level variation in  $R^*$ , which underlines the ecological and  
241 evolutionary significance of this result.

242

243 *No relationships with land use*

244 We found no relationships between the land-use intensities recorded in the Biodiversity  
245 Exploratories and the three studied functional traits. This contrasts with previous studies in  
246 the Biodiversity Exploratories (Völler *et al.*, 2013, 2017) as well as in other systems that  
247 demonstrated land use-related phenotypic changes in plants (e.g. Aarssen & Turkington,  
248 1985a, b, c, 1987; Lennartsson *et al.*, 1997; Briggs, 2009). In principle, there are three  
249 possible explanations: (1) a true pattern could not be detected because of statistical or  
250 methodological shortcomings, (2) there was no pattern yet because the land use has not been  
251 acting long enough yet in our system, or (3) there is no pattern. As already explained above,  
252 our study did not lack statistical power, and it covered a broad range of land use intensities,  
253 also compared to previous studies. Moreover, although there is some interannual variation in  
254 land use in the Biodiversity Exploratories (Blüthgen *et al.*, 2012; Allan *et al.*, 2014), which  
255 could potentially impede the impacts of natural selection, previous studies already found land  
256 use-related differentiation of plant phenotypes in our system (Völler *et al.*, 2013, 2017). It is  
257 also known from other studies that that a couple of years can be enough for stable shifts in  
258 plant phenotypes between differential management (Briggs, 2009). Therefore, explanations  
259 (1) and (2) both appear unlikely, and we need to consider the third option that there might  
260 simply be no relationships between land use and the three studied functional traits; possibly  
261 because of the derived nature of the traits, or evolutionary constraints particular to these traits  
262 and land use in this system.

263

264 *Correlations between three functional traits*

265 Besides quantifying intraspecific variation in the three functional traits and their relationships  
266 with land use, we also tested for interrelationships between traits, and we did this at three  
267 levels: plant individuals, maternal seed families and populations. Each of these levels

268 provides us with different answers: at the level of individuals, trait correlations are most likely  
269 related to functional-physiological constraints or necessities, whereas at the level of seed  
270 families they reflect underlying genetic correlations, and at the level of populations they  
271 rather indicate trait syndromes associated with habitat adaptation.

272 We found no relationships between competitive ability and pulse response at any of  
273 these levels. This was surprising as lower  $R^*$  values (i.e. better competitive ability) should be  
274 coupled to a resource-conservative plant economy, whereas strong responses to nutrient  
275 pulses require a large metabolic capacity. We therefore expected a trade-off between the two  
276 traits. However, our results suggest that competitive ability evolves independently. The only  
277 observed trait correlation involving competitive ability was a positive population-level  
278 correlation between competitive ability and clipping tolerance, indicating both traits might be  
279 beneficial in the same environments. Resprouting in *Plantago lanceolata* is based on  
280 belowground resource storage (Latzel & Klimesová, 2009; Latzel *et al.*, 2014). Thus, in  
281 contrast to pulse response, both clipping tolerance and  $R^*$  competitive ability are resource-  
282 conservative, and therefore both traits should be beneficial in the less nutrient-rich pastures or  
283 meadows which make up part of the grassland plots in the Biodiversity Exploratories.  
284 However, the two traits were not significantly correlated at the level of individuals or seed  
285 families, indicating that they are not physiologically or genetically linked. Another potential  
286 explanation for the lack of a family-level relationship could be the inflated genetic variation in  
287 the  $F_1$  generation already explained above (see also Gáspár *et al.*, 2019). However, while  $F_1$   
288 plants from the same mother may have many different fathers, these most likely come from  
289 the same population (Kuiper & Bos, 1992, p. 226), so that population-level differences may  
290 have been maintained, and could thus be detected, in our study.

291 Surprisingly, plant responses to nutrient pulses were negatively correlated to clipping  
292 tolerance at the levels of individuals and maternal seed families. Together with the lack of a  
293 population differentiation in these traits, this indicates physiological and/or genetic links

294 between them. Again, resource economy appears to be the best explanation. Clipping  
295 tolerance is generally thought to be more prevalent in species or genotypes with a more  
296 conservative metabolism and more root-, non-structural carbohydrate reserves, whereas a  
297 stronger response to a nutrient pulse should requires higher metabolic rate and less storage  
298 (Strauss & Agrawal, 1999; Reich, 2014). Thus, there could be a classic resource allocation  
299 trade-off between the two traits. The explanation is further supported by the fact that we  
300 found the negative correlation mainly in plants from plots with less than one mowing event  
301 per year, whereas the relationship tended to disappear at higher mowing frequencies. In the  
302 Biodiversity Exploratories, frequent mowing is usually associated with strong fertilisation  
303 (Blüthgen *et al.*, 2012). Thus, the resource trade-off disappears when resources become less  
304 limiting (Agrawal *et al.*, 2010).

305

## 306 **Acknowledgements**

307 Our work has been funded through the DFG Priority Program 1374 ‘Biodiversity  
308 Exploratories’ (DFG grants DU 404/9-1 and BO 3241/2-1). We thank the managers of the  
309 three Exploratories, Kirsten Reichel-Jung, Katrin Lorenzen and Martin Gorke, and all former  
310 managers, for their work in maintaining the plot and project infrastructure, Christiane Fischer  
311 and Jule Mangels for their support through the central office, Andreas Ostrowski and Michael  
312 Owonibi for managing the central database, and Markus Fischer, Eduard Linsenmair,  
313 Dominik Hessenmöller, Daniel Prati, Ingo Schöning, Francois Buscot, Ernst-Detlef Schulze,  
314 Wolfgang Weisser and the late Elisabeth Kalko for their role in setting up the Biodiversity  
315 Exploratories project. Fieldwork permits were issued by the responsible state environmental  
316 offices of Baden-Württemberg, Thüringen, and Brandenburg (according to §72  
317 BbgNatSchG). We are grateful to Florian Frosch and Jan Helbach for their help during the  
318 field campaign, to Christiane Karasch-Wittmann, Eva Schloter, Sabine Silberhorn and  
319 Zhiyong Liao for their technical assistance at the University of Tübingen, to Andre Velescu at  
320 the Karlsruhe Institute of Technology for soil analyses, and to Niek Scheepens for his support  
321 with data analyses.

322

323 **Literature Cited**

- 324 Aarssen LW. 1992. Causes and consequences of variation in competitive ability in plant  
325 communities. *Journal of Vegetation Science* 3: 165–174.
- 326 Aarssen LW. 2005. On size, fecundity, and fitness in competing plants. In: Reekie EG,  
327 Bazzaz FA, eds. *Reproductive Allocation in Plants*. Academic Press, 215–244.
- 328 Aarssen L, Keogh T. 2002. Conundrums of competitive ability in plants: what to measure?  
329 *Oikos* 96: 531–542.
- 330 Aarssen LW, Turkington R. 1985a. Within-species diversity in natural populations of *Holcus*  
331 *lanatus*, *Lolium perenne* and *Trifolium repens* from four different-aged pastures. *The*  
332 *Journal of Ecology* 73: 869–886.
- 333 Aarssen LW, Turkington R. 1985b. Biotic specialization between neighbouring genotypes in  
334 *Lolium perenne* and *Trifolium repens* from a permanent pasture. *The Journal of Ecology*  
335 73: 605–614.
- 336 Aarssen LW, Turkington R. 1985c. Competitive relations among species from pastures of  
337 different ages. *Canadian Journal of Botany* 63: 2319–2325.
- 338 Aarssen LW, Turkington R. 1987. Responses to defoliation in *Holcus lanatus*, *Lolium*  
339 *perenne*, and *Trifolium repens* from three different-aged pastures. *Canadian Journal of*  
340 *Botany* 65: 1364–1370.
- 341 Agrawal AA. 1998. Induced responses to herbivory and increased plant performance. *Science*  
342 279: 1201–1202.
- 343 Agrawal AA, Conner JK, Rasmann S. 2010. Tradeoffs and negative correlations in  
344 evolutionary ecology. In: M. A. Bell, W. F. Eanes, D. J. Futuyma, and J. S. Levinton, ed.  
345 *Evolution After Darwin: The First 150 Years*. 243–268.
- 346 Agrawal AA, Strauss SY, Stout MJ. 1999. Costs of induced responses and tolerance to  
347 herbivory in male and female fitness components of wild radish. *Evolution* 53: 1093–1104.
- 348 Allan E, Bossdorf O, Dormann CF, Prati D, Gossner MM, Tschardt T, Blüthgen N, Bellach

- 349 M, Birkhofer K, Boch S, *et al.* 2014. Interannual variation in land-use intensity enhances  
350 grassland multidiversity. *Proceedings of the National Academy of Sciences of the United*  
351 *States of America* 111: 308–313.
- 352 Bergelson J, Crawley MJ. 1992. The effects of grazers on the performance of individuals and  
353 populations of scarlet gilia, *Ipomopsis aggregata*. *Oecologia* 90: 435–444.
- 354 Bilbrough CJ, Caldwell MM. 1997. Exploitation of springtime ephemeral N pulses by six  
355 Great Basin plant species. *Ecology* 78: 231–243.
- 356 Blüthgen N, Dormann CF, Prati D, Klaus VH, Kleinebecker T, Hölzel N, Alt F, Boch S,  
357 Gockel S, Hemp A, *et al.* 2012. A quantitative index of land-use intensity in grasslands:  
358 Integrating mowing, grazing and fertilization. *Basic and Applied Ecology* 13: 207–220.
- 359 Briggs D. 2009. *Plant Microevolution and Conservation in Human-influenced Ecosystems*.  
360 Cambridge University Press.
- 361 Coumou D, Rahmstorf S. 2012. A decade of weather extremes. *Nature Climate Change* 2:  
362 491–496.
- 363 Davies, M.S. & Snaydon, R.W. 1973. Physiological differences among populations of  
364 *Anthoxanthum odoratum* L. on the Park Grass Experiment, Rothamsted. I. Response to  
365 calcium. *Journal of Applied Ecology* 10: 33–45.
- 366 Davies, M.S. & Snaydon, R.W. 1976. Rapid population differentiation in a mosaic  
367 environment. III. Measures of selection pressures. *Heredity* 36: 59–66.
- 368 Díaz S, Settele J, Brondízio E, Ngo H, Guèze M, Agard J, Arneth A, Balvanera P, Brauman  
369 K, Butchart S, *et al.* 2019. Summary for policymakers of the global assessment report on  
370 biodiversity and ecosystem services of the Intergovernmental Science-Policy Platform on  
371 Biodiversity and Ecosystem Services.
- 372 Fischer M, Bossdorf O, Gockel S, Hänsel F, Hemp A, Hessenmöller D, Korte G, Nieschulze  
373 J, Pfeiffer S, Prati D, *et al.* 2010. Implementing large-scale and long-term functional  
374 biodiversity research: The Biodiversity Exploratories. *Basic and Applied Ecology* 11: 473–



- 375 485.
- 376 Foley JA, Defries R, Asner GP, Barford C, Bonan G, Carpenter SR, Chapin FS, Coe MT,  
377 Daily GC, Gibbs HK, *et al.* 2005. Global consequences of land use. *Science* 309: 570–574.
- 378 Gáspár B, Bossdorf O, Durka W. 2019. Structure, stability and ecological significance of  
379 natural epigenetic variation: a large-scale survey in *Plantago lanceolata*. *The New*  
380 *Phytologist* 221: 1585–1596.
- 381 Gratton C, Denno RF. 2003. Inter-year carryover effects of a nutrient pulse on *Spartina*  
382 plants, herbivores, and natural enemies. *Ecology* 84: 2692–2707.
- 383 Johnson MTJ. 2011. Evolutionary ecology of plant defenses against herbivores. *Functional*  
384 *Ecology* 25: 305–311.
- 385 Juenger T, Bergelson J. 2000. The evolution of compensation to herbivory in scarlet gilia,  
386 *Ipomopsis aggregata*: herbivore-imposed natural selection and the quantitative genetics of  
387 tolerance. *Evolution* 54: 764–777.
- 388 Keddy PA. 1990. Competitive hierarchies and centrifugal organization in plant communities.  
389 In: Grace JB, Tilman D, eds. *Perspectives on Plant Competition*. Academic Press, 265–  
390 290.
- 391 Kloss L, Fischer M, Durka W. 2011. Land-use effects on genetic structure of a common  
392 grassland herb: A matter of scale. *Basic and Applied Ecology* 12: 440–448.
- 393 Kuiper PJC, Bos M. 1992. *Plantago: A Multidisciplinary Study*. Springer.
- 394 Latzel V, Klimešová J. 2009. Fitness of resprouters versus seeders in relation to nutrient  
395 availability in two *Plantago* species. *Acta Oecologica* 35: 541–547.
- 396 Latzel V, Janeček Š, Hájek T, Klimešová J. 2014. Biomass and stored carbohydrate  
397 compensation after above-ground biomass removal in a perennial herb: does  
398 environmental productivity play a role? *Folia Geobotanica* 49: 17–29.
- 399 Lennartsson T, Nilsson P, Tuomi J. 1998. Induction of overcompensation in the field gentian:  
400 *Gentianella campestris*. *Ecology* 79: 1061–1072.

- 401 Lennartsson T, Tuomi J, Nilsson P. 1997. Evidence for an evolutionary history of  
402 overcompensation in the grassland biennial *Gentianella campestris* (Gentianaceae). *The*  
403 *American Naturalist* 149: 1147–1155.
- 404 Manning P, Gossner MM, Bossdorf O, Allan E, Zhang Y-Y, Prati D, Blüthgen N, Boch S,  
405 Böhm S, Börschig C, *et al.* 2015. Grassland management intensification weakens the  
406 associations among the diversities of multiple plant and animal taxa. *Ecology* 96: 1492–  
407 1501.
- 408 McNaughton SJ. 1983. Compensatory plant growth as a response to herbivory. *Oikos* 40:  
409 329–336.
- 410 Miao SL, Bazzaz FA, Primack RB. 1991. Persistence of maternal nutrient effects in *Plantago*  
411 *major*: the third generation. *Ecology* 72: 1634–1642.
- 412 Ostfeld RS, Keesing F. 2000. Pulsed resources and community dynamics of consumers in  
413 terrestrial ecosystems. *Trends in Ecology & Evolution* 15: 232–237.
- 414 Parepa M, Fischer M, Bossdorf O. 2013. Environmental variability promotes plant invasion.  
415 *Nature Communications* 4: 1604.
- 416 Pons TL. 1992. Seed germination of *Plantago major* ssp. *major* and *Plantago lanceolata*. In:  
417 *Plantago: A Multidisciplinary Study*. Springer, 161–169.
- 418 R Development Core Team. 2008. R: A Language and Environment for Statistical  
419 Computing.
- 420 Reich PB. 2014. The world-wide ‘fast–slow’ plant economics spectrum: a traits manifesto.  
421 *The Journal of Ecology* 102: 275–301.
- 422 Snaydon RW, Davies MS. 1976. Rapid population differentiation in a mosaic environment.  
423 IV. Populations of *Anthoxanthum odoratum* at sharp boundaries. *Heredity* 37: 9–27.
- 424 Soliveres S, van der Plas F, Manning P, Prati D, Gossner MM, Renner SC, Alt F, Arndt H,  
425 Baumgartner V, Binkenstein J, *et al.* 2016. Biodiversity at multiple trophic levels is needed  
426 for ecosystem multifunctionality. *Nature* 536: 456–459.

- 427 Stapledon RG. 1928. Cocksfoot grass (*Dactylis Glomerata* L.): Ecotypes in relation to the  
428 biotic factor. *The Journal of Ecology* 16: 71–104.
- 429 Strauss SY, Agrawal AA. 1999. The ecology and evolution of plant tolerance to herbivory.  
430 *Trends in Ecology & Evolution* 14: 179–185.
- 431 Tilman D. 1985. The resource-ratio hypothesis of plant succession. *The American Naturalist*  
432 125: 827–852.
- 433 Tokeshi M. 2009. *Species Coexistence: Ecological and Evolutionary Perspectives*. John  
434 Wiley & Sons.
- 435 Völler E, Auge H, Bossdorf O, Prati D. 2013. Land use causes genetic differentiation of life-  
436 history traits in *Bromus hordeaceus*. *Global Change Biology* 19: 892–899.
- 437 Völler E, Bossdorf O, Prati D, Auge H. 2017. Evolutionary responses to land use in eight  
438 common grassland plants. *The Journal of Ecology* 105: 1290–1297.
- 439 Warwick SI, Briggs D. 1978. The Genecology of Lawn Weeds. I. Population differentiation  
440 in *Poa annua* L. in a mosaic environment of bowling green lawns and flower beds. *The*  
441 *New Phytologist* 81: 711–723.
- 442 Warwick SI, Briggs D. 1979. The Genecology of Lawn Weeds. III. Cultivation experiments  
443 with *Achillea millefolium* L., *Bellis perennis* L., *Plantago lanceolata* L., *Plantago major* L.  
444 and *Prunella vulgaris* L. collected from lawns and contrasting grassland habitats. *The New*  
445 *Phytologist* 83: 509–536.
- 446 Weiner J. 1988. The influence of competition on plant reproduction. In: Lovett Doust J,  
447 Lovett Doust L, eds. *Plant reproductive ecology: patterns and strategies*. Oxford  
448 University Press, 228–245.
- 449 Wilson JB, Spijkerman E, Huisman J. 2007. Is there really insufficient support for Tilman's  
450  $R^*$  concept? A comment on Miller *et al.* *The American Naturalist* 169: 700–706.
- 451 Yang LH, Bastow JL, Spence KO, Wright AN. 2008. What can we learn from resource  
452 pulses? *Ecology* 89: 621–634.

453 Zuur AF, Ieno EN, Walker NJ, Saveliev AA, Smith GM. 2009. *Mixed effects models and*  
454 *extensions in ecology with R*. Springer.  
455

456 **Table 1.** Results of mixed models testing for heritable variation in three functional traits in  
457 *Plantago lanceolata*, with populations and seed families as fixed and random factors,  
458 respectively. LRT = likelihood-ratio test. All *P*-values are FDR-corrected.

|                     | Population |              | Seed family |              |
|---------------------|------------|--------------|-------------|--------------|
|                     | <i>F</i>   | <i>P</i>     | <i>LRT</i>  | <i>P</i>     |
| Competitive ability | 1.60       | <b>0.049</b> | 16.82       | <b>0.000</b> |
| Pulse response      | 1.01       | 0.463        | 0.04        | 0.835        |
| Clipping tolerance  | 1.30       | 0.169        | 4.05        | 0.066        |

459

460 **Table 2.** Results of mixed models testing for the effects of mowing, fertilisation and grazing  
461 on three functional traits in *Plantago lanceolata*, with populations and seed families included  
462 as random factors. Est. = slope estimate of the models. All *P*-values are FDR-corrected.

|                     | Mowing |          |          | Fertilisation |          |          | Grazing |          |          |
|---------------------|--------|----------|----------|---------------|----------|----------|---------|----------|----------|
|                     | Est.   | <i>F</i> | <i>P</i> | Est.          | <i>F</i> | <i>P</i> | Est.    | <i>F</i> | <i>P</i> |
| Competitive ability | 0.142  | 4.31     | 0.387    | 0.050         | 1.51     | 0.504    | -0.071  | 1.68     | 0.504    |
| Pulse response      | 0.014  | 0.08     | 0.838    | 0.001         | 0.04     | 0.838    | 0.009   | 0.06     | 0.838    |
| Clipping tolerance  | 0.007  | 1.85     | 0.838    | 0.011         | 1.60     | 0.504    | 0.007   | 0.39     | 0.838    |

463

464 **Table 3.** Results of random slope and intercept mixed effects models testing for relationships  
465 between competitive ability (CA), pulse response (PR) and clipping tolerance (CT) in  
466 *Plantago lanceolata*, with populations and seed families included as random factors. Est. =  
467 slope estimate of the models. All *P*-values are FDR-corrected, and *P*<0.05 are in bold.

|         | Individuals |          |              | Families |          |              | Populations |          |              |
|---------|-------------|----------|--------------|----------|----------|--------------|-------------|----------|--------------|
|         | Est.        | <i>F</i> | <i>P</i>     | Est.     | <i>F</i> | <i>P</i>     | Est.        | <i>F</i> | <i>P</i>     |
| CA ~ PR | 0.07        | 3.26     | 0.162        | 0.12     | 1.31     | 0.336        | 0.01        | 0.00     | 0.967        |
| CA ~ CT | -0.01       | 0.01     | 0.967        | 0.11     | 1.33     | 0.336        | 0.44        | 6.21     | <b>0.048</b> |
| PR ~ CT | -0.05       | 11.47    | <b>0.009</b> | -0.05    | 8.81     | <b>0.018</b> | -0.05       | 2.52     | 0.212        |

468

469

470 **Figure 1.** Schematic of the sequence and duration of experimental treatments used to estimate  
471 competitive ability ( $R^*$ ), pulse response and clipping tolerance in *Plantago lanceolata* plants  
472 from 54 grasslands of different land-use intensities.

473

474 **Figure 2.** Variation among populations (boxplots) and seed families (black dots within  
475 boxplots) in three functional traits in *Plantago lanceolata*. The boxplots are based on all  
476 individuals per population and indicate medians, 25th/75th percentiles, and the 1.5 x  
477 interquartile ranges. For each trait, populations are ordered by their median values.

478

479 **Figure 3.** Relationships between the three studied functional traits of *Plantago lanceolata* at  
480 the levels of individuals, seed families and populations. Solid and dashed line plots indicate  
481 the fitted models for significant and non-significant relationships, respectively, with their 95%  
482 confidence intervals.

483

484 **Figure 4.** The mowing intensity of their grasslands of origin affects functional trait  
485 correlations in *Plantago lanceolata*. Each dot represents a plant individual grown in a  
486 common environment.



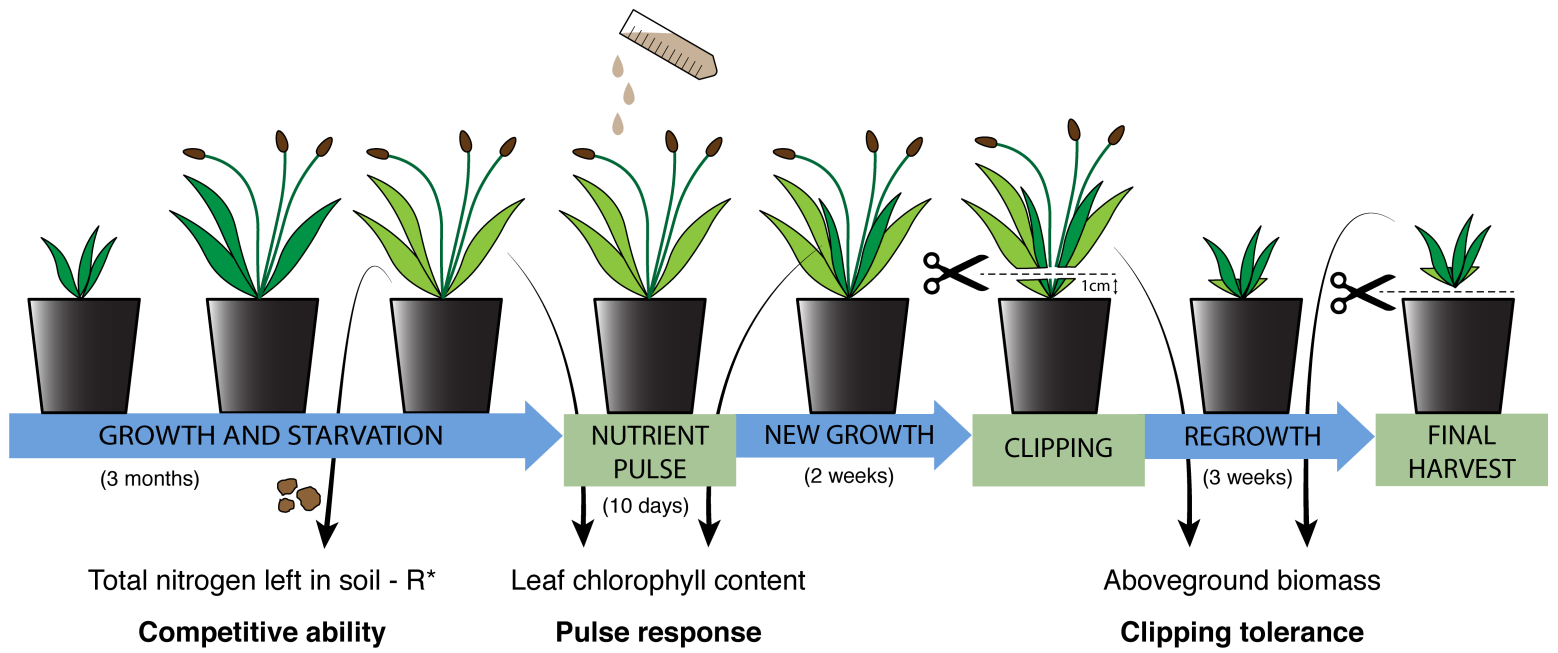

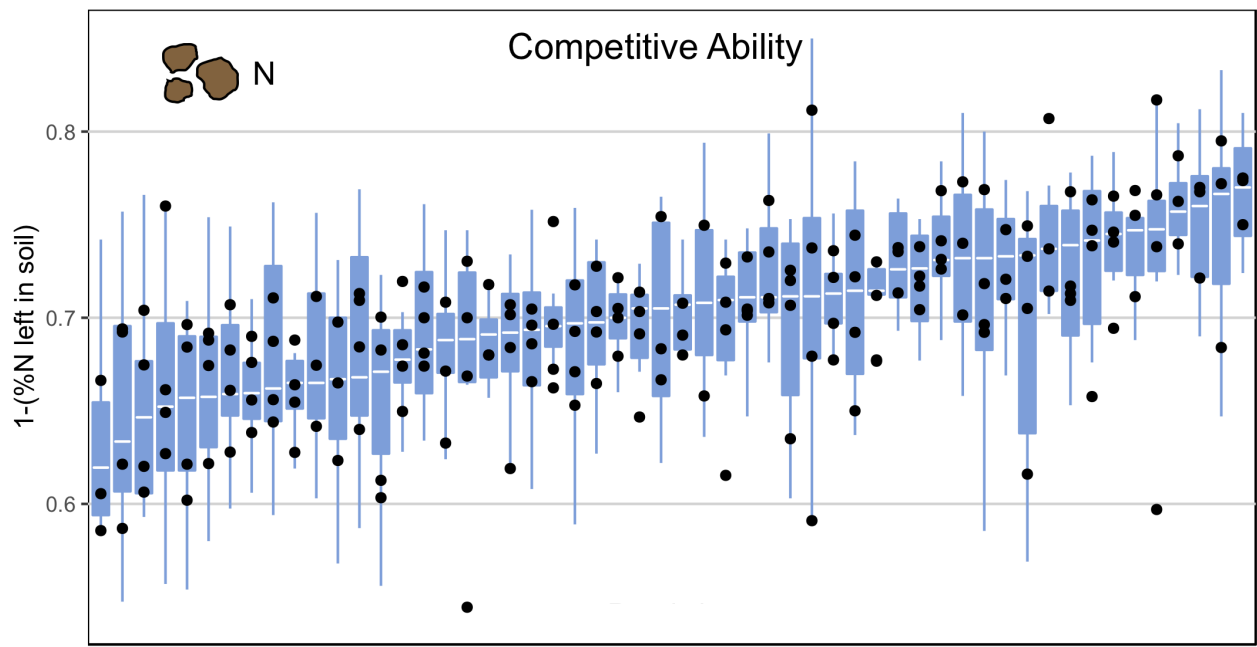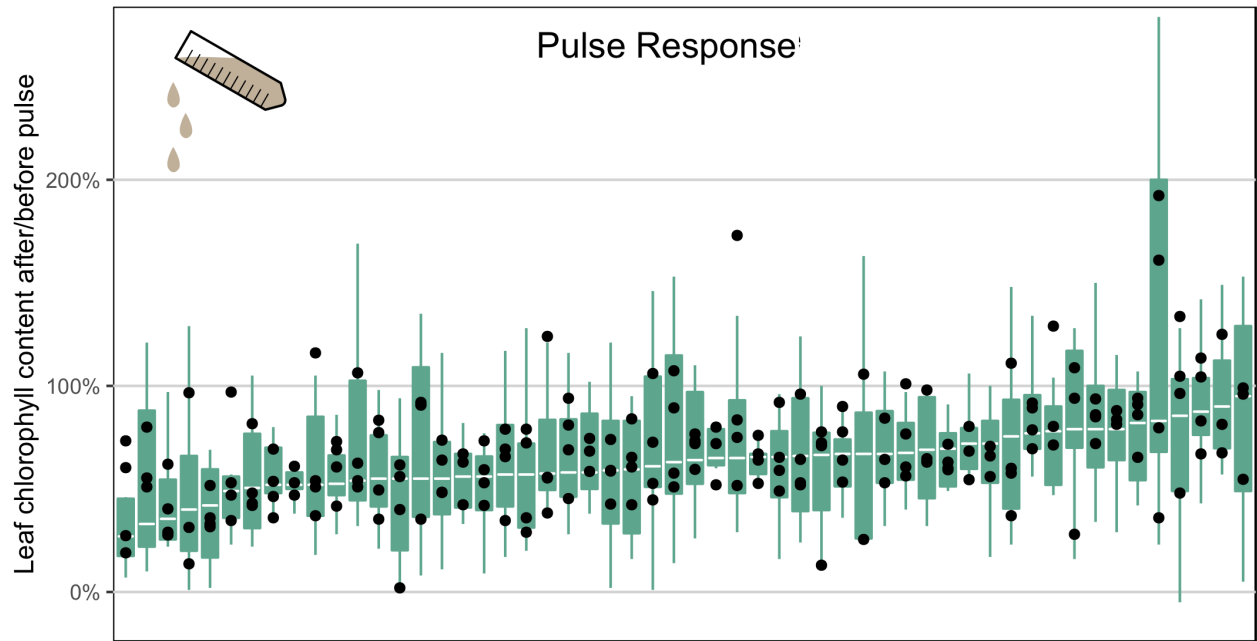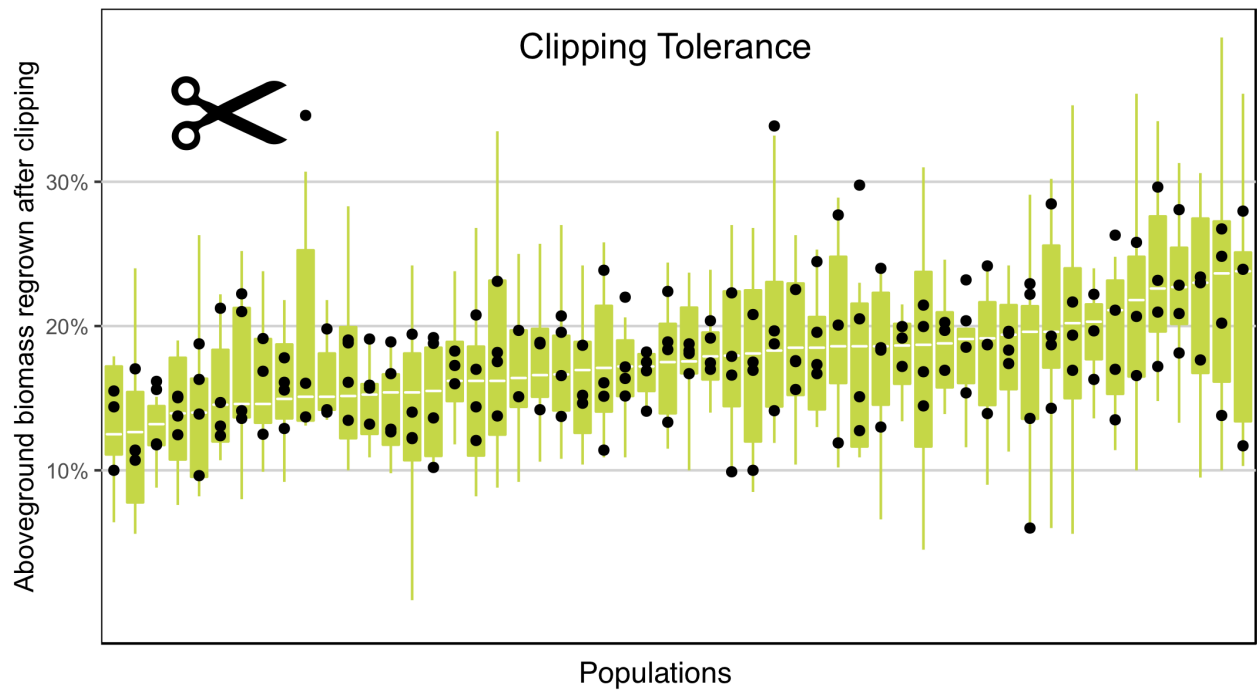

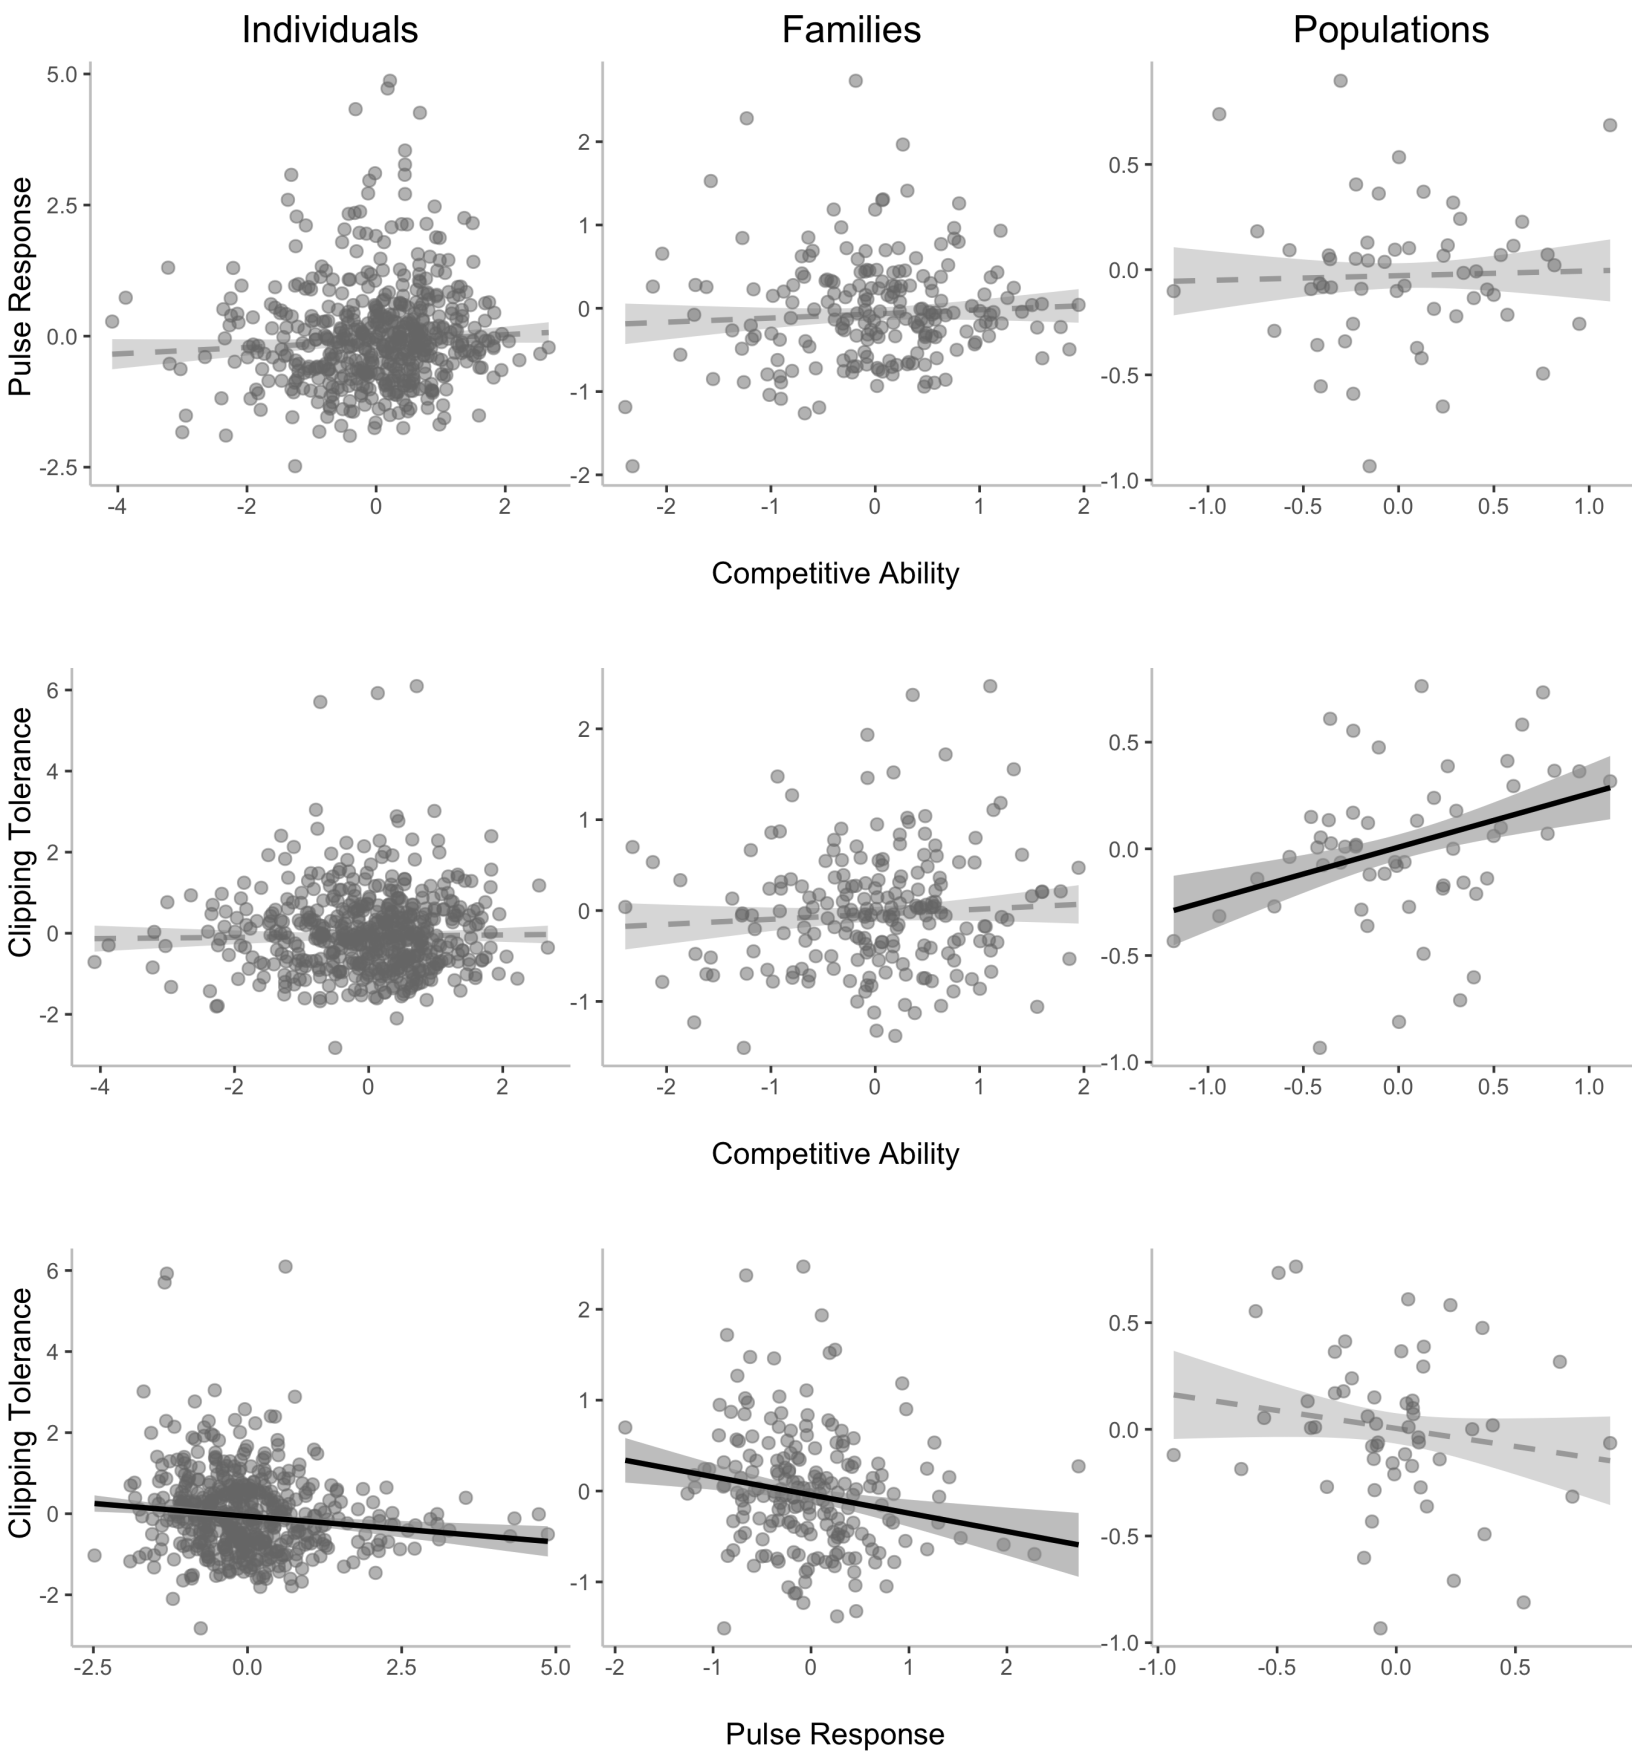

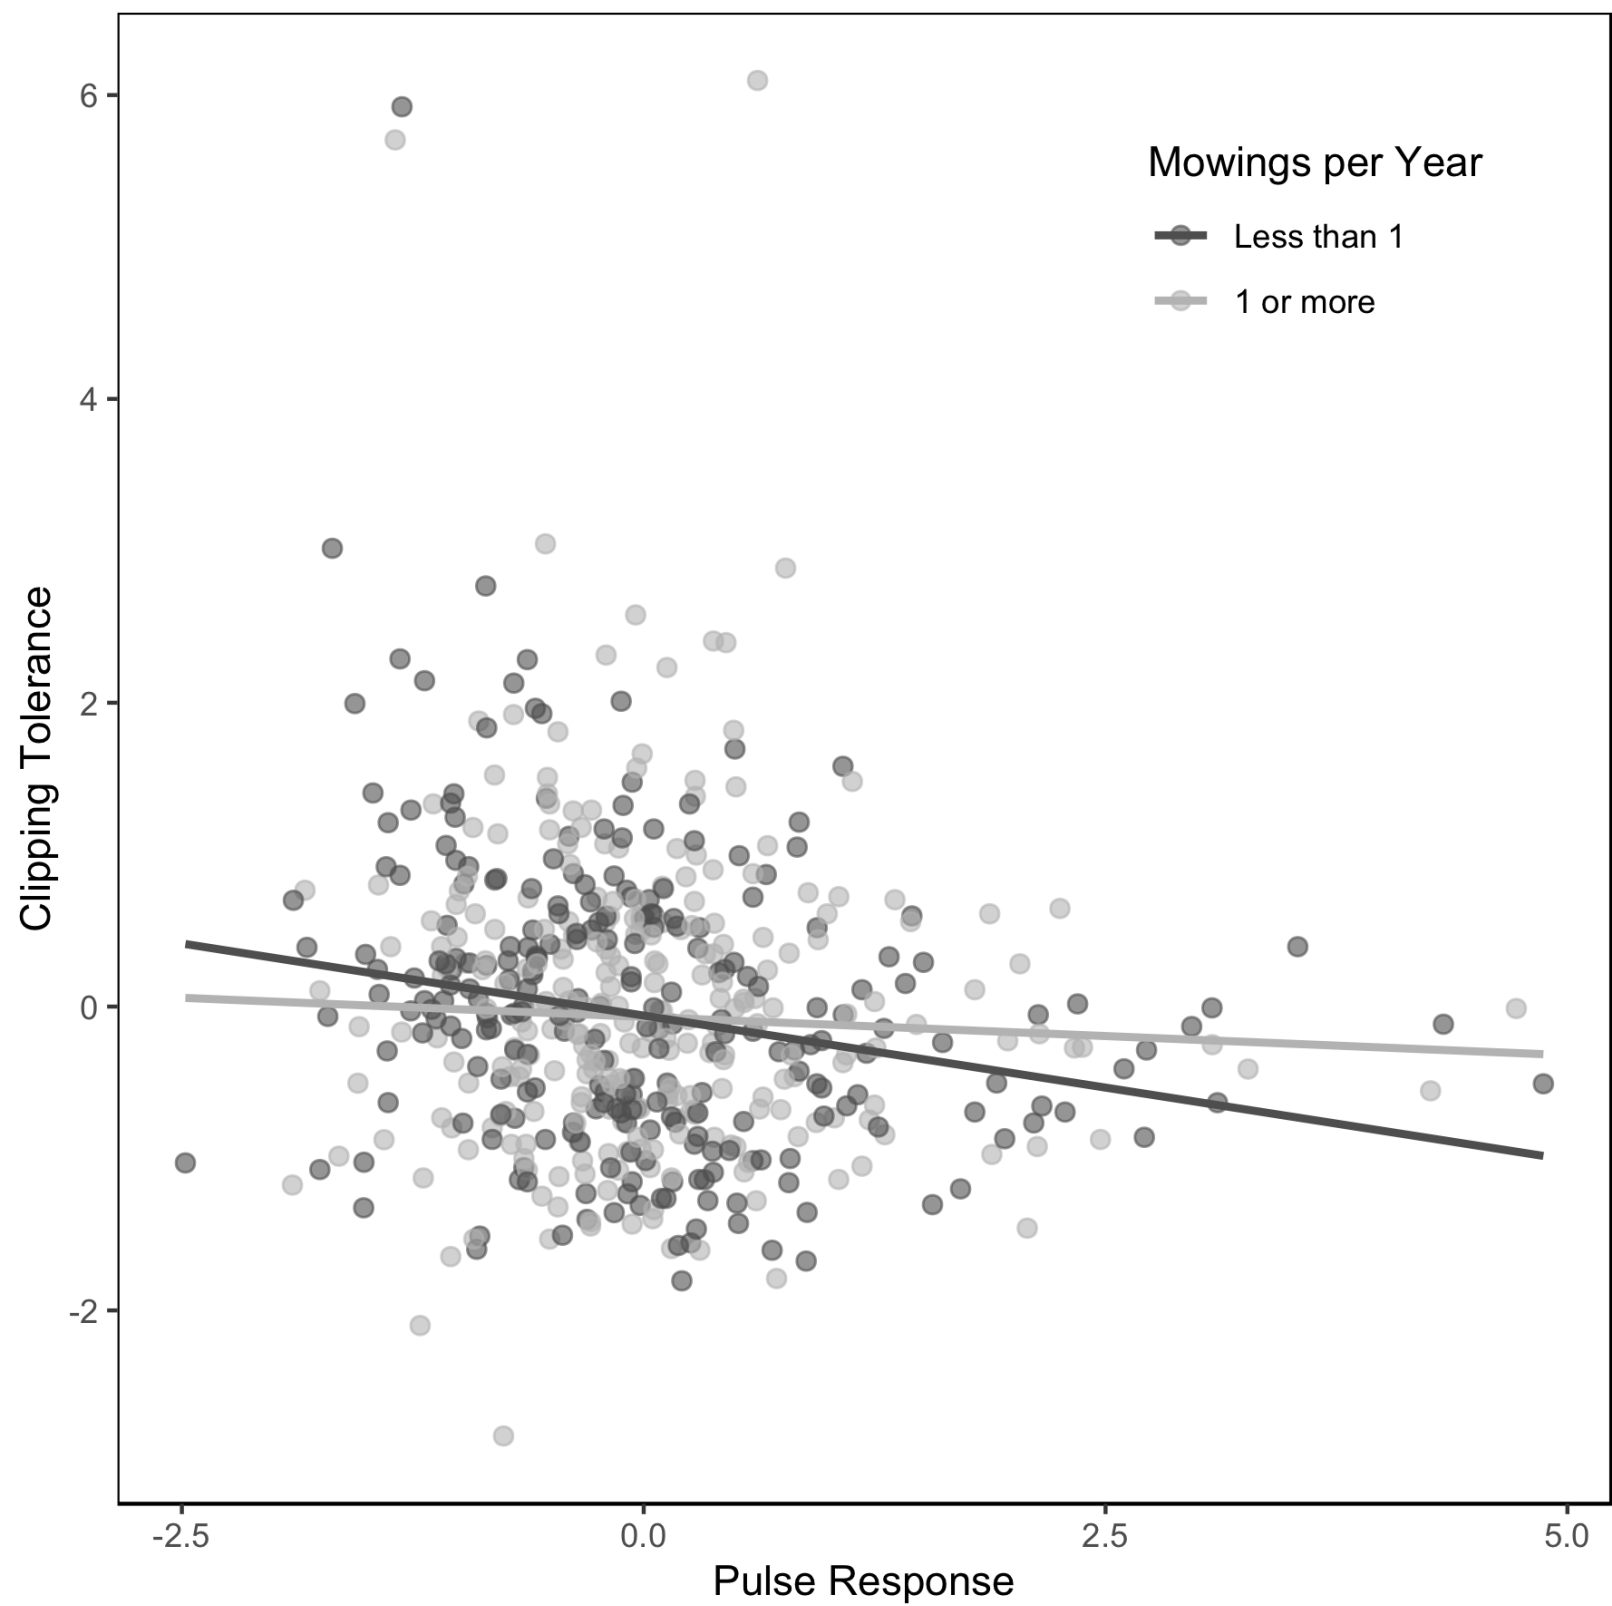

Source: https://www.biorxiv.org/content/10.1101/2020.02.28.967521v1.full.pdf
